# Supplementary material for: Trends in Patient Characteristics and COVID-19 In-Hospital Mortality in the United States During the COVID-19 Pandemic
Source: PubMed Central journal article supplement (PMC8094014; doi:10.1001/jamanetworkopen.2021.8828), 2021-05-03
Supplement: jamanetwopen-e218828-s001.pdf [file jamanetwopen-e218828-s001.pdf]

## Supplementary Online Content

Roth GA, Emmons-Bell S, Alger HM, et al. Trends in patient characteristics and COVID-19 in-hospital mortality in the United States during the COVID-19 pandemic. *JAMA Netw Open*. 2021;4(5):e218828. doi:10.1001/jamanetworkopen.2021.8828

**eFigure.** Study Flowchart of Patients With COVID-19 Enrolled in AHA GWTG Registry

**eTable 1.** Missingness by Variable

**eTable 2.** Length of Stay by Month and Age Group

**eTable 3.** Univariate and Multivariate Association With In-Hospital Death

**eTable 4.** Counts of Inpatients and Deaths, and In-Hospital Mortality Rate, by Month

This supplementary material has been provided by the authors to give readers additional information about their work.

**eFigure. Study Flowchart of Patients With COVID-19 Enrolled in AHA GWTG**

**Registry**

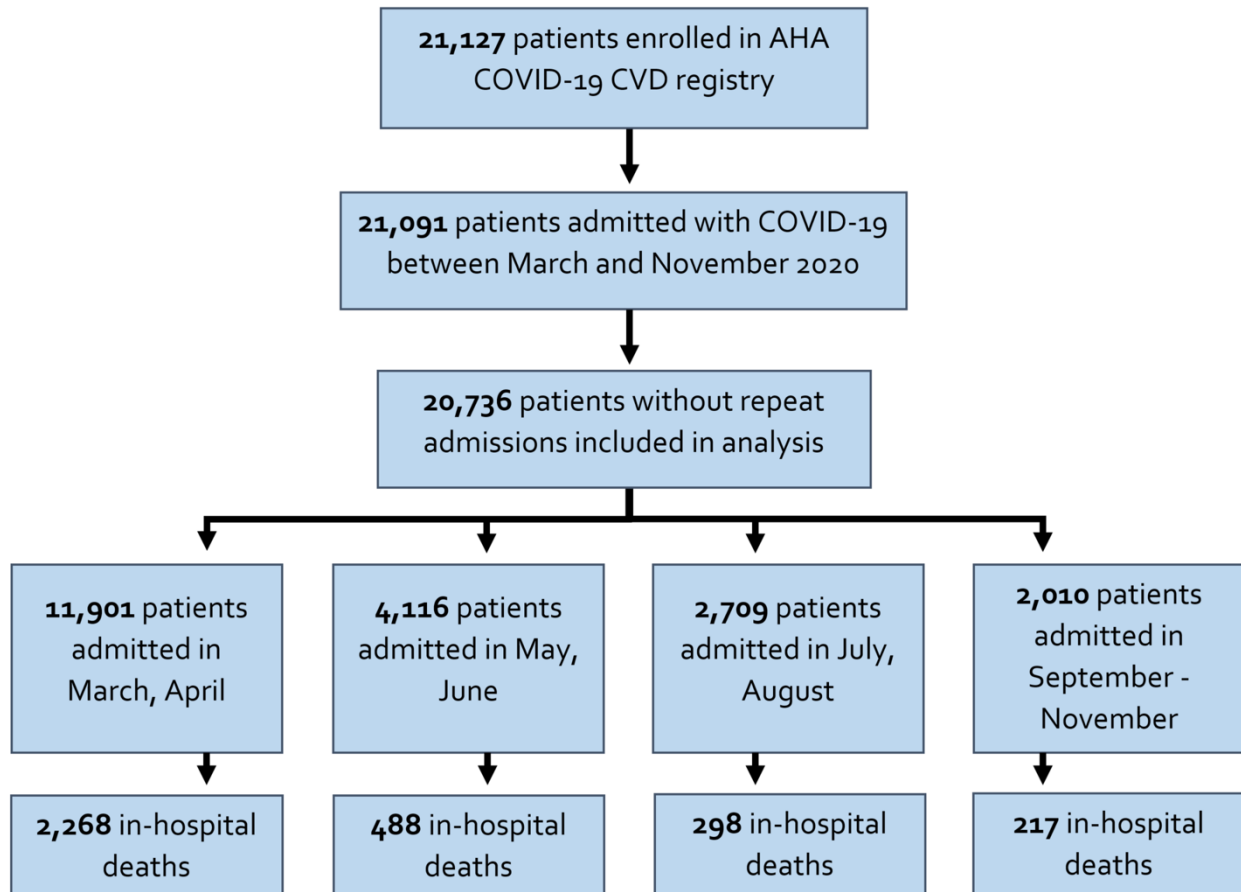

**eTable 1. Missingness by Variable**

|                             | <b>March, April</b><br>(n=11,901) | <b>May, June</b><br>(n=4,116) | <b>July, August</b><br>(n=2,709) | <b>September, November</b><br>(n=2,010) | <b>Total</b><br>(n=20,736) |
|-----------------------------|-----------------------------------|-------------------------------|----------------------------------|-----------------------------------------|----------------------------|
| Women                       | 0 (0%)                            | 0 (0%)                        | 0 (0%)                           | 0 (0%)                                  | 0 (0%)                     |
| Age                         | 0 (0%)                            | 0 (0%)                        | 0 (0%)                           | 0 (0%)                                  | 0 (0%)                     |
| <b>Survival status</b>      |                                   |                               |                                  |                                         |                            |
| In-hospital death           | 0 (0%)                            | 0 (0%)                        | 0 (0%)                           | 0 (0%)                                  | 0 (0%)                     |
| <b>Past medical history</b> |                                   |                               |                                  |                                         |                            |
| CABG or PCI                 | 0 (0%)                            | 0 (0%)                        | 0 (0%)                           | 0 (0%)                                  | 0 (0%)                     |
| Cancer                      | 0 (0%)                            | 0 (0%)                        | 0 (0%)                           | 0 (0%)                                  | 0 (0%)                     |
| Cerebrovascular disease     | 0 (0%)                            | 0 (0%)                        | 0 (0%)                           | 0 (0%)                                  | 0 (0%)                     |
| Chronic kidney disease      | 0 (0%)                            | 0 (0%)                        | 0 (0%)                           | 0 (0%)                                  | 0 (0%)                     |
| Diabetes                    | 0 (0%)                            | 0 (0%)                        | 0 (0%)                           | 0 (0%)                                  | 0 (0%)                     |
| Heart failure               | 0 (0%)                            | 0 (0%)                        | 0 (0%)                           | 0 (0%)                                  | 0 (0%)                     |
| Hypertension                | 0 (0%)                            | 0 (0%)                        | 0 (0%)                           | 0 (0%)                                  | 0 (0%)                     |

|                                  |                  |            |             |             |                  |
|----------------------------------|------------------|------------|-------------|-------------|------------------|
| Pulmonary disease                | 0 (0%)           | 0 (0%)     | 0 (0%)      | 0 (0%)      | 0 (0%)           |
| Smoking                          | 0 (0%)           | 0 (0%)     | 0 (0%)      | 0 (0%)      | 0 (0%)           |
| <b>Admission Characteristics</b> |                  |            |             |             |                  |
| BMI, kg/m <sup>2</sup>           | 1,854<br>(15.6%) | 326 (7.9%) | 120 (4.4%)  | 64 (3.2%)   | 7,092<br>(11.4%) |
| O2 saturation, %                 | 1,239<br>(10.4%) | 182 (4.4%) | 37 (1.4%)   | 16 (0.8%)   | 4,422 (7.1%)     |
| Supplemental O2                  | 1,239<br>(10.4%) | 184 (4.5%) | 42 (1.6%)   | 17 (0.8%)   | 4,446 (7.1%)     |
| Interstitial infiltrates         | 1,028 (8.6%)     | 376 (9.1%) | 453 (16.7%) | 212 (10.5%) | 6,207 (10%)      |
| Respiratory rate                 | 770 (6.5%)       | 70 (1.7%)  | 32 (1.2%)   | 25 (1.2%)   | 2,691 (4.3%)     |
| Heart rate                       | 698 (5.9%)       | 62 (1.5%)  | 28 (1%)     | 8 (0.4%)    | 2,388 (3.8%)     |
| Systolic BP, mmHg                | 724 (6.1%)       | 134 (3.3%) | 170 (6.3%)  | 44 (2.2%)   | 3,216 (5.2%)     |
| Creatinine, mg/dL                | 868 (7.3%)       | 135 (3.3%) | 75 (2.8%)   | 55 (2.7%)   | 3,399 (5.5%)     |

Values represent number, and percent, of admissions with missing values for each covariate.

**eTable 2. Length of Stay by Month and Age Group**

| Length of Stay<br>(days) | March - April | May - June  | July - August | September -<br>November | Total       |
|--------------------------|---------------|-------------|---------------|-------------------------|-------------|
| 18-50, mean<br>(SD)      | 8.7 (10.4)    | 7.6 (10.1)  | 7.3 (8.4)     | 6.0 (6.1)               | 8.0 (9.8)   |
| 51-60, mean<br>(SD)      | 11.2 (12.9)   | 10.1 (10.8) | 9.5 (11.0)    | 7.6 (6.9)               | 10.5 (11.9) |
| 61-70, mean<br>(SD)      | 12.4 (13.8)   | 11.1 (11.3) | 11.0 (11.3)   | 8.3 (7.7)               | 11.5 (12.6) |
| 71-80, mean<br>(SD)      | 11.9 (12.8)   | 11.2 (10.8) | 10.5 (10.1)   | 8.3 (6.7)               | 11.2 (11.7) |
| 81 plus, mean<br>(SD)    | 9.5 (9.2)     | 9.7 (8.6)   | 9.2 (7.6)     | 7.6 (6.3)               | 9.4 (8.7)   |
| All ages, total<br>days  | 126,910       | 39,526      | 25,163        | 15,103                  | 206,702     |

**eTable 3. Univariate and Multivariate Association With In-Hospital Death**

|                                  | Univariate association with mortality | P-value, Univariate association with mortality | Multivariate association with mortality | P-value, multivariate association with mortality |
|----------------------------------|---------------------------------------|------------------------------------------------|-----------------------------------------|--------------------------------------------------|
| Women                            | 0.72 (0.66 - 0.77)                    | <.001                                          | 0.74 (0.68 - 0.81)                      | <.001                                            |
| Age 18 - 25                      | 0.16 (0.08 - 0.30)                    | <.001                                          | 0.26 (0.13 - 0.51)                      | <.001                                            |
| Age 26 - 30                      | 0.31 (0.19 - 0.50)                    | <.001                                          | 0.45 (0.28 - 0.75)                      | <.01                                             |
| Age 31 - 35                      | 0.34 (0.23 - 0.51)                    | <.001                                          | 0.43 (0.29 - 0.66)                      | <.001                                            |
| Age 36 - 40                      | 0.46 (0.33 - 0.65)                    | <.001                                          | 0.54 (0.37 - 0.77)                      | <.001                                            |
| Age 41 - 45                      | 0.44 (0.32 - 0.60)                    | <.001                                          | 0.44 (0.32 - 0.62)                      | <.001                                            |
| Age 46 - 50                      | 0.81 (0.63 - 1.03)                    | .09                                            | 0.86 (0.66 - 1.12)                      | .26                                              |
| Age 51 - 55                      | Reference category                    | N/A                                            | Reference category                      | N/A                                              |
| Age 56 - 60                      | 1.24 (1.01 - 1.53)                    | .04                                            | 1.2 (0.96 - 1.51)                       | .11                                              |
| Age 61 - 65                      | 1.43 (1.17 - 1.75)                    | <.01                                           | 1.35 (1.09 - 1.68)                      | <.01                                             |
| Age 66 - 70                      | 2.19 (1.81 - 2.66)                    | <.001                                          | 1.99 (1.61 - 2.46)                      | <.001                                            |
| Age 71 - 75                      | 2.82 (2.33 - 3.42)                    | <.001                                          | 2.71 (2.19 - 3.36)                      | <.001                                            |
| Age 76 - 80                      | 3.38 (2.79 - 4.10)                    | <.001                                          | 3.41 (2.75 - 4.23)                      | <.001                                            |
| Age 81 - 85                      | 3.73 (3.06 - 4.55)                    | <.001                                          | 4.21 (3.36 - 5.28)                      | <.001                                            |
| Age 86 - 90                      | 4.62 (3.76 - 5.70)                    | <.001                                          | 5.16 (4.06 - 6.57)                      | <.001                                            |
| Age 91 - 95                      | 4.95 (3.90 - 6.27)                    | <.001                                          | 5.65 (4.28 - 7.45)                      | <.001                                            |
| Age 96 - 110                     | 4.70 (3.34 - 6.62)                    | <.001                                          | 5.07 (3.43 - 7.49)                      | <.001                                            |
| <b>Past medical history</b>      |                                       |                                                |                                         |                                                  |
| CABG or PCI                      | 1.83 (1.60 - 2.08)                    | <.001                                          | 1.08 (0.92 - 1.26)                      | .33                                              |
| Cancer                           | 1.63 (1.47 - 1.80)                    | <.001                                          | 1.25 (1.1 - 1.41)                       | <.001                                            |
| Cerebrovascular disease          | 1.80 (1.63 - 1.99)                    | <.001                                          | 1.2 (1.05 - 1.37)                       | <.01                                             |
| Chronic kidney disease           | 1.95 (1.77 - 2.15)                    | <.001                                          | 0.88 (0.77 - 1.01)                      | .06                                              |
| Diabetes                         | 1.46 (1.35 - 1.58)                    | <.001                                          | 1.1 (1 - 1.21)                          | .04                                              |
| Heart failure                    | 2.15 (1.94 - 2.34)                    | <.001                                          | 1.22 (1.07 - 1.38)                      | <.01                                             |
| Hypertension                     | 1.94 (1.79 - 2.10)                    | <.001                                          | 1.07 (0.96 - 1.19)                      | .24                                              |
| Pulmonary disease                | 1.31 (1.20 - 1.44)                    | <.001                                          | 1.07 (0.96 - 1.2)                       | .22                                              |
| Smoking                          | 1.08 (0.93 - 1.25)                    | .32                                            | 1.11 (0.93 - 1.33)                      | .25                                              |
| <b>Admission characteristic</b>  |                                       |                                                |                                         |                                                  |
| BMI < 20, kg/m <sup>2</sup>      | 1.03 (0.87 - 1.23)                    | .72                                            | 0.84 (0.69 - 1.03)                      | .09                                              |
| BMI 20 - 24.9, kg/m <sup>2</sup> | Reference category                    | N/A                                            | Reference category                      | N/A                                              |

|                                   |                    |       |                    |       |
|-----------------------------------|--------------------|-------|--------------------|-------|
| BMI 25 – 29.9, kg/m <sup>2</sup>  | 0.84 (0.76 - 0.94) | <.01  | 1.01 (0.89 - 1.14) | .90   |
| BMI 30 – 34.9 , kg/m <sup>2</sup> | 0.70 (0.63 - 0.79) | <.001 | 1.08 (0.94 - 1.24) | .28   |
| BMI 35 – 39.9, kg/m <sup>2</sup>  | 0.70 (0.61 - 0.80) | <.001 | 1.18 (1 - 1.4)     | .05   |
| BMI 40 – 44.9, kg/m <sup>2</sup>  | 0.67 (0.56 - 0.80) | <.001 | 1.18 (0.95 - 1.46) | .13   |
| BMI >= 45, kg/m <sup>2</sup>      | 0.71 (0.59 - 0.84) | <.001 | 1.44 (1.16 - 1.79) | <.001 |
| O2 saturation <=70%               | 7.79 (6.21 – 9.76) | <.001 | 6.91 (5.24 - 9.11) | <.001 |
| O2 saturation 71 - 85%            | 3.45 (3.01 – 3.95) | <.001 | 3 (2.54 - 3.53)    | <.001 |
| O2 saturation 86 - 93%            | 1.65 (1.51 - 1.79) | <.001 | 1.5 (1.36 - 1.66)  | <.001 |
| O2 saturation 94 – 100%           | Reference category | N/A   | Reference category | N/A   |
| Supplemental O2, n (%)            | 3.20 (2.97 - 3.46) | <.001 | 2.82 (2.56 - 3.1)  | <.001 |
| Interstitial infiltrates          | 2.22 (2.00 - 2.45) | <.001 | 1.58 (1.41 - 1.78) | <.001 |
| Respiratory rate <= 20            | Reference category | N/A   | Reference category | N/A   |
| Respiratory rate 21 - 25          | 1.69 (1.54 - 1.86) | <.001 | 1.37 (1.23 - 1.53) | <.001 |
| Respiratory rate 26 - 30          | 2.12 (1.89 - 2.38) | <.001 | 1.59 (1.39 - 1.82) | <.001 |
| Respiratory rate >30              | 3.44 (3.05 – 3.88) | <.001 | 2.08 (1.78 - 2.42) | <.001 |
| Heart rate <=100                  | Reference category | N/A   | Reference category | N/A   |
| Heart rate 101 - 130              | 1.09 (1.00 - 1.18) | .04   | 1.3 (1.18 - 1.43)  | <.001 |
| Heart rate >130                   | 1.84 (1.55 - 2.20) | <.001 | 1.9 (1.52 - 2.36)  | <.001 |
| Systolic BP <= 110 mmHg           | 1.61 (1.42 - 1.81) | <.001 | 1.26 (1.09 - 1.45) | <.01  |
| Systolic BP 111 – 120 mmHg        | Reference category | N/A   | Reference category | N/A   |
| Systolic BP 121 – 150 mmHg        | 0.91 (0.82 – 1.02) | .12   | 0.9 (0.79 - 1.03)  | .11   |
| Systolic BP > 150 mmHg            | 0.97 (0.86 - 1.11) | .70   | 0.82 (0.71 - 0.96) | .01   |
| Creatinine <=1.5 mg/dL            | Reference category | N/A   | Reference category | N/A   |
| Creatinine 1.6 - 2 mg/dL          | 2.51 (2.23 – 2.83) | <.001 | 1.63 (1.42 - 1.88) | <.001 |
| Creatinine >2 mg/dl               | 3.47 (3.18 - 3.80) | <.001 | 2.45 (2.17 - 2.76) | <.001 |

Univariate association with mortality represents unadjusted odds ratios between each variable and inpatient mortality. Multivariate association represents adjusted odds ratios of our primary adjustment model reported in the paper.

**eTable 4. Counts of Inpatients and Deaths, and In-Hospital Mortality Rate, by Month**

|           | Inpatients, number | Deaths, number | In-hospital mortality rate, percent |
|-----------|--------------------|----------------|-------------------------------------|
| March     | 5,039              | 1,077          | 21.4%                               |
| April     | 6,862              | 1,191          | 17.4%                               |
| May       | 2,574              | 312            | 12.1%                               |
| June      | 1,542              | 176            | 11.4%                               |
| July      | 1,549              | 175            | 11.3%                               |
| August    | 1,160              | 123            | 10.6%                               |
| September | 739                | 95             | 12.9%                               |
| October   | 910                | 99             | 10.9%                               |
| November  | 361                | 23             | 6.4%                                |
